# Supplementary material for: Identification of two regulatory binding sites which confer myotube specific expression of the mono-ADP-ribosyltransferase ART1 gene
Source: PubMed Central journal article supplement (PMC2575215; doi:10.1186/1471-2199-9-91), 2008-10-21
Supplement: 1471-2199-9-91-S1.pdf [file 1471-2199-9-91-S1.pdf]

-1236 CTTTCTCTCGCACC

**A/T-rich**

-1222 TCCCTTGTGCTTGA**CTATAAAATAAC**CTAGTTCTGAGTTCAGATGCCCAGTTGGGTGTAAT

-1162 GGGAGAAGGACCCAGCTTGC GGGAAGGTGAAGGAGGGACGTTCTTAACACCAAGGGTTAG

**E box**

-1102 AGATGC**CTCCTGTTG**GGGCCACCATTAGCATAGGATAAGGCCTCTCCAGTCCAGCTCATG

-1042 AATTTACCCATCACCACCCTTTACCACCTCATATTGTCTAGCCAAATAAAGTTTCTCTTAC

-982 CCAAAGCCTCTTTTCTCCTCCAATCCTTCTGAAGGCTAAAGAGAAAAACAACTATGT

-922 CCAGCAGTGATCCCTTCCCTTCCCTCCTGACCCCATCCTCCCTTTCTGGGAGGAATTCAGG

**E box**

-862 TACTTGCAGTTTCTGGGACAG**CAGATG**CTGTGTGGGGCAGCCTATGGCTTGGGGATTTT

**E box**

-802 CTTATATCCTAGCACCCGGAAC**TCCAAGAAGTGGAGTCAAATCTGGT****CACGTTG**GGGTCA

-742 GGGATCCTGAGAGGGGCAGCATCCTCTCAGGTCACACGGTGAGTCAGAGATCCAGCAGGA

-682 AGCTAGGTTCTTTAGGGCAGAACAAAGCTTGCCCTAAACAACATGCATTGTAACTTTAT

-622 ATGCCCCAGTACAGGGGAAC**TTCGGGGCCAAGAAGTGGGAGTGGGTGGGTAGGGGAGCAG**

-562 GGTGGTGGTGGGATATAGGGGGCTTTTCGGGATAGCATTGAAATGTAAATGAAGAAAATA

-502 CCTAATAAAAAATTTGAAAAAAAAAAAAAAAAAAAAAAAAAAAAAAAAAAGAACATGCATTGTGGTGG

-442 TACATGCCTATAACCCTAGCAATCGGCAGGGAAGCTGGGGCAACAGGATTGCTTCAAGAT

-382 CAAGGTCAGCCTGGACTTTGTGAAAGAAAGTATTAAGACAACAACAACAATTAACCACCA
